# Supplementary material
Source: PubMed Central journal article supplement (PMC5610089)
Supplement: NIHMS896355-supplement.pdf [file NIHMS896355-supplement.pdf]

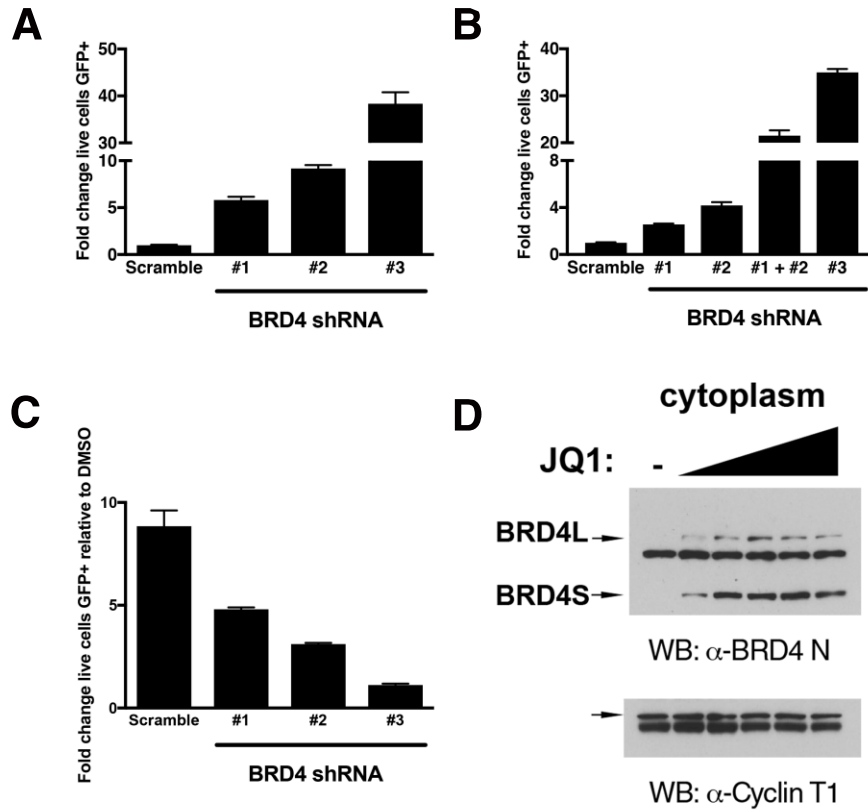

**Figure S1. Related to Figure 1. Short BRD4 Promotes HIV-1 latency**

(A) J-Lat A2 cells were transduced with lentiviral shRNAs targeting BRD4 as in Figure 1 or scramble non-targeting shRNAs as controls. Flow cytometry of GFP indicating HIV transcriptional activity (mean of three independent experiments analyzed in triplicate  $\pm$  SEM).

(B) J-Lat A2 cells were transduced with indicated BRD4 shRNAs, either alone or in combination, and GFP levels were analyzed via flow cytometry. Mean ( $\pm$ SD) of one experiment performed in triplicate is shown.

(C) Flow cytometry of J-Lat A2 cells transduced with shRNAs described in Figure 1 treated with JQ1 (625nM for 18h). Means of three independent experiments analyzed in triplicate  $\pm$  SEM is shown.

(D) Western blotting of cytoplasmic fractions from J-Lat A72 cells treated with increasing concentrations of JQ1, as in Figure 1D, using BRD4 and Cyclin T1 antibodies.

Supplementary Figure 2

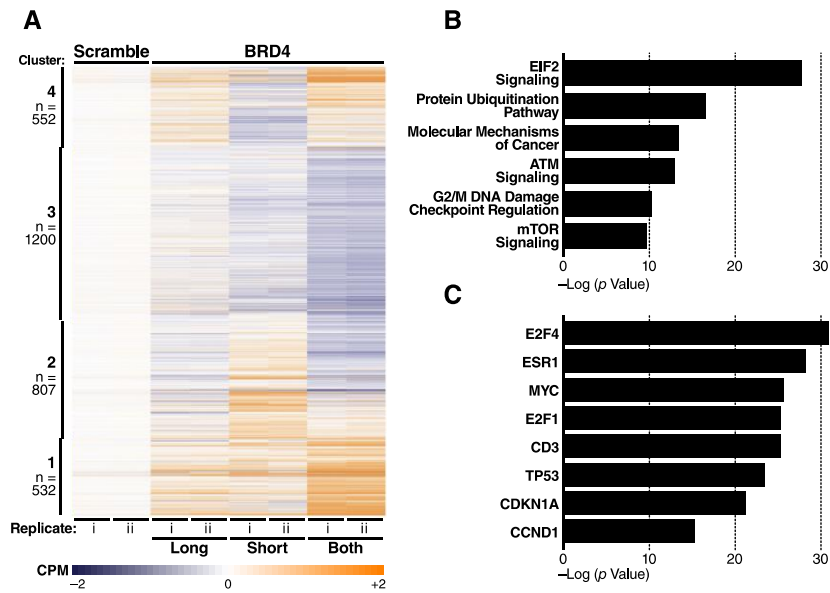

16.052 D4 R.Conrad

**Figure S2. Related to Figure 1. Transcriptional disruption upon knockdown of BRD4 isoforms**

(A) Heatmap of binned RNA-Seq data from J-Lat A72 cells transduced with shRNAs as in Figure 1. Unsupervised non-hierarchical clustering of differentially expressed genes is shown to the left. Bottom scale is -2 (blue) to 2 (orange) counts per million (CPM) normalized to the respective scramble control.

(B) Canonical pathways enriched in total differentially expressed genes as revealed by Ingenuity Pathway Analysis (Qiagen).

(C) Upstream regulators enriched in total differentially expressed genes as revealed by Ingenuity Pathway Analysis (Qiagen).

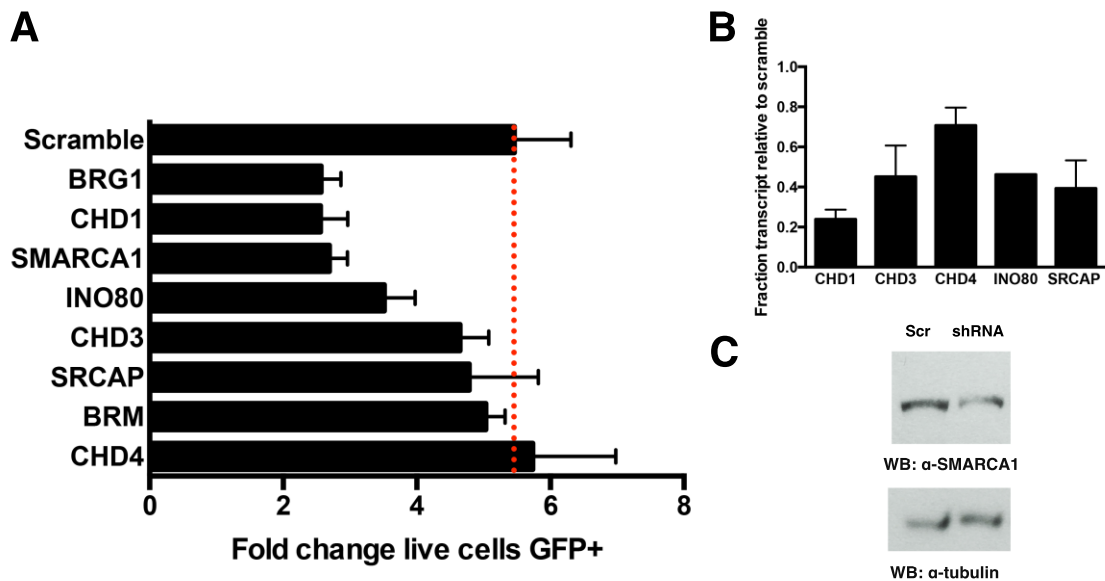

**Figure S3. Related to Figure 3. Targeted Screen of Chromatin Remodeling ATPases Reveals BRG1 as Necessary for JQ1-Mediated Reversal of HIV-1 Latency**

(A) Flow cytometry measuring HIV reactivation in the presence 625nM JQ1 for 18h in J-Lat A72 cells transduced with shRNAs targeting indicated factors.

(B, C) Knockdown was assessed via qPCR (relative to RPL13A) for all ATPases (B) with the exception of BRG1 (Figure 3A), BRM (Figure 3A), and SMARCA1 (C). Screen flow cytometry data represent the average of three independent experiments normalized to respective DMSO controls  $\pm$ SEM, and the knockdown assessment is representative.

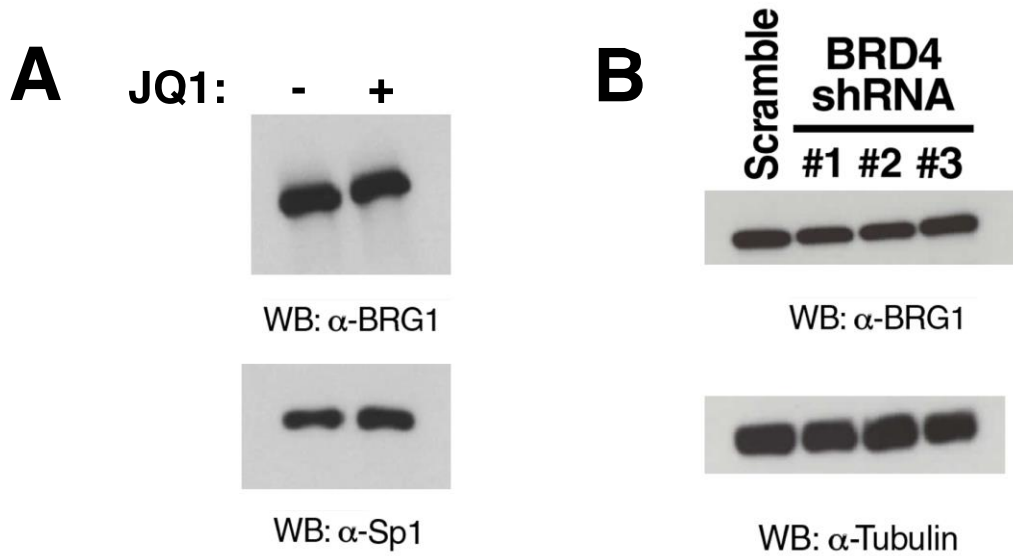

**Figure S4. Related to Figure 5. BET Inhibition and BRD4 Knockdown Do Not Alter BRG1 Protein Levels**

(A) Western blotting of J-Lat A72 nuclear/chromatin extracts from cells treated with DMSO or 625nM for 18h.

(B) Western blotting of J-Lat A72 nuclear/chromatin extracts from cells transduced with BRD4 shRNAs (see Figure 5).

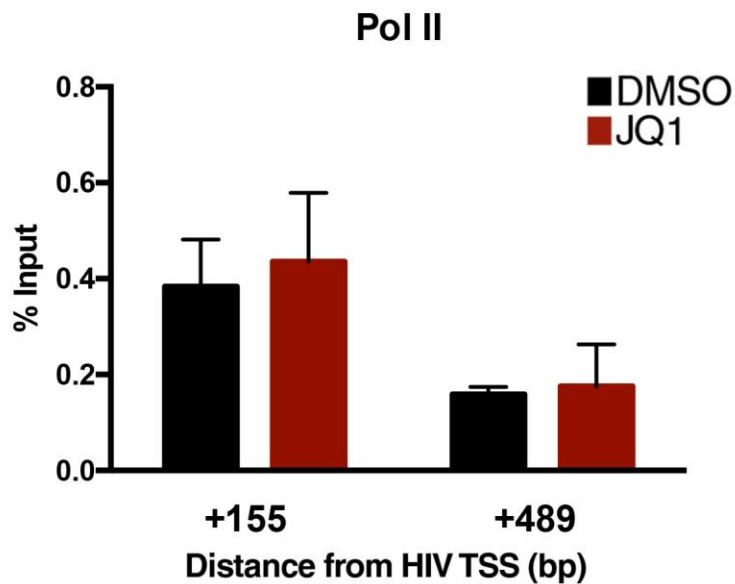

**Figure S5. Related to Figure 5. JQ1 Minimally Induces Pol II Recruitment at the HIV Promoter**

Pol II ChIP-qPCR data from J-Lat A72 cells treated with DMSO or 625nM for 18h. X-axis numbers represent nt distance relative to the HIV-1 TSS. Data are the mean of three independent experiments normalized to non-specific IgG values  $\pm$ SEM.

| <b>Sample</b> | <b>Total Tags</b> | <b>Mapped Tags</b> |
|---------------|-------------------|--------------------|
| DMSO_BRD4.1   | 39787057          | 38402467           |
| DMSO_BRD4.2   | 35118886          | 34290080           |
| DMSO_BRD4.3   | 47073281          | 43519248           |
| DMSO_BRG1.1   | 37494392          | 35522186           |
| DMSO_BRG1.2   | 35160019          | 32726945           |
| DMSO_ATAC.1   | 70258268          | 67469014           |
| DMSO_input.1  | 30240996          | 25798593           |
| DMSO_input.2  | 35835457          | 29793598           |
| DMSO_input.3  | 32765315          | 26815133           |
| DMSO_poll.1   | 52937018          | 43868906           |
| DMSO_poll.2   | 39917419          | 38652036           |
| JQ1_BRD4.1    | 41040011          | 39262978           |
| JQ1_BRD4.2    | 30768417          | 25107028           |
| JQ1_BRD4.3    | 51920881          | 41604201           |
| JQ1_BRG1.1    | 45587840          | 44010500           |
| JQ1_BRG1.2    | 46728098          | 45461766           |
| JQ1_ATAC.1    | 100675510         | 96900178           |
| JQ1_input.1   | 32474538          | 27561140           |
| JQ1_input.2   | 39716940          | 33755427           |
| JQ1_input.3   | 29760842          | 24868159           |
| JQ1_poll.1    | 47759352          | 45997031           |
| JQ1_poll.2    | 49831921          | 48331980           |
| RNA_scr.1     | 48885572          | 36726146           |
| RNA_scr.2     | 56828958          | 42848770           |
| RNA_sh1.1     | 43746089          | 32355456           |
| RNA_sh1.2     | 47885622          | 37034631           |
| RNA_sh2.1     | 50331493          | 38305565           |
| RNA_sh2.2     | 49194910          | 37757689           |
| RNA_sh3.1     | 43094648          | 33146144           |
| RNA_sh3.2     | 53506369          | 41328763           |

**Table S1. Related to Figures 6, 7, S2. Mapping statistics for high throughput sequencing experiments.**

| <b>Primer</b>          | <b>Application</b>                         | <b>Forward (5' to 3')</b>                           | <b>Reverse (5' to 3')</b>                        |
|------------------------|--------------------------------------------|-----------------------------------------------------|--------------------------------------------------|
| <b>AflII_HIV</b>       | AflII accessibility                        | TGGGAGCTCTCTG<br>GCTAACTA                           | CTGGTTTCCCTTT<br>CGCTTTC                         |
| <b>LM-PCR_A</b>        | LM-PCR 1 <sup>st</sup> strand<br>synthesis | -                                                   | ATTTTTGGCGTAC<br>TCACCAGTC                       |
| <b>LM-PCR_linkers</b>  | LM-PCR ligation                            | GCGGTGACCCGG<br>GAGATCTGAATTC                       | GAATTCAGATC                                      |
| <b>LM-PCR_B</b>        | LM-PCR<br>amplification                    | GCGGTGACCCGG<br>GAGATCTGAATTC                       | ATTTTTGGCGTAC<br>TCACCAGTC                       |
| <b>LM-PCR_C</b>        | LM-PCR labeling                            | -                                                   | 6-FAM-<br>TACTCACCAGTCG<br>CCGCCCCCTCGCT<br>CTTG |
| <b>HIV_ChIP_155</b>    | ChIP-qPCR                                  | AGTGTGTGCCCGT<br>CTGTTGT                            | TTCGCTTTCAGGT<br>CCCTGTT                         |
| <b>HIV_ChIP_489</b>    | ChIP-qPCR                                  | GCAAGCAGGGAG<br>CTAGAACG                            | GGATGGTTGTAGC<br>TGTCCAGT                        |
| <b>HIV_GFP</b>         | RT-qPCR                                    | ATGGTGAGCAAG<br>GGCGAGGAG                           | GTGGTGCAGATGA<br>ACTTCAG                         |
| <b>RPL13A</b>          | RT-qPCR                                    | GCCCTACGACAAG<br>AAAAAGCG                           | TACTTCCAGCCAA<br>CCTCGTGA                        |
| <b>CHD1</b>            | RT-qPCR                                    | AAACAGTAGTGG<br>AGAATCAAGCC                         | AGAACTCGAACC<br>AGATCCAGAG                       |
| <b>CHD3</b>            | RT-qPCR                                    | CCGTCAGCATTGG<br>GTGTGAA                            | TCTTGCGTTTTTCG<br>GGGTTTTTC                      |
| <b>CHD4</b>            | RT-qPCR                                    | GGAGCCTAAATCA<br>TCTGCTCAG                          | GTGAGGGTTCGAT<br>AATCCTCCT                       |
| <b>INO80</b>           | RT-qPCR                                    | TGCGACAAACGTC<br>AGCTATCT                           | CTGGGGCAATAAT<br>GGATTACTGT                      |
| <b>SRCAP</b>           | RT-qPCR                                    | AACTGGCGCTATC<br>TCATTCTGG                          | CTGTTCTGCAAGG<br>GAGTTCCT                        |
| <b>BDS</b>             | Cloning                                    | CGACAAGCTTCC<br>CCCAGAGACCTC                        | GACGGATCCCTAC<br>TCAGGCTCGTCC                    |
| <b>IDS</b>             | Cloning                                    | CGACAAGCTTATG<br>CCGGACGAGCCTG                      | GACGGATCCCTAC<br>TTGCACTTGTCCT<br>C              |
| <b>ET</b>              | Cloning                                    | CGACAAGCTTTTCG<br>GAGGAAGAGGAC<br>AAG               | GACGGATCCCTAT<br>TGAGGTTTCCTTT<br>TCTTCCG        |
| <b>SV40-NLS_linker</b> | Cloning                                    | GACAAGCTTCCAA<br>AGAAGAAGCGGA<br>AGGTCAAGCTTGA<br>T | ATCAAGCTTGACC<br>TTCCGCTTCTTCTT<br>TGGAAGCTTGTC  |

**Table S2. Related to Figures 1–5, S3, S5. PCR primers used.**
